# Supplementary material for: A Multidimensional Mass Spectrometry-Based Workflow for De Novo Structural Elucidation of Oligosaccharides from Polysaccharides
Source: PubMed Central journal article supplement — J Am Soc Mass Spectrom. 2021 Jul 15;32(8):2175–85. doi: 10.1021/jasms.1c00133 (PMC8344699; doi:10.1021/jasms.1c00133), 2021-07-15
Supplement: js1c00133_si_001.pdf [file js1c00133_si_001.pdf]

1  
2  
3  
4  
5  
6  
7  
8  
9  
10  
11  
12  
13  
14  
15  
16  
17  
18  
19  
20  
21

## Supporting Information

### A Multidimensional Mass Spectrometry-based Workflow for *de Novo* Structural Elucidation of Oligosaccharides from Polysaccharides

Juan J. Castillo,<sup>†</sup> Ace G. Galermo,<sup>†</sup> Matthew J. Amicucci,<sup>†,‡</sup> Eshani Nandita,<sup>†</sup> Garret Couture,<sup>†</sup> Nikita Bacalzo,<sup>†</sup> Ye Chen,<sup>†</sup> and Carlito B. Lebrilla<sup>\*,†</sup>

<sup>†</sup>Department of Chemistry, University of California Davis, Davis, CA 95616.

<sup>‡</sup> Agricultural and Environmental Chemistry Graduate Group, University of California Davis, Davis, CA 95616.

Corresponding Author. \*E-mail: cblebrilla@ucdavis.edu. Phone: +1 530 752 6364. Fax: +1 530 752 8995.

#### Table of Contents

|                      |     |
|----------------------|-----|
| List of Figures..... | S-2 |
| Figure S-1 .....     | S-3 |
| Figure S-2 .....     | S-4 |

22 **List of Figures**

23

24 **Figure S-1.** Plot of the ratios of T-glucose/4-glucose relative linkage abundance versus DP of  
25 observed and expected maltooligosaccharide linkages.

26 **Figure S-2.** Plot of the ratios of T-galactose/4-galactose relative linkage abundances versus DP of  
27 observed and expected linkages from galactan oligosaccharides.

28

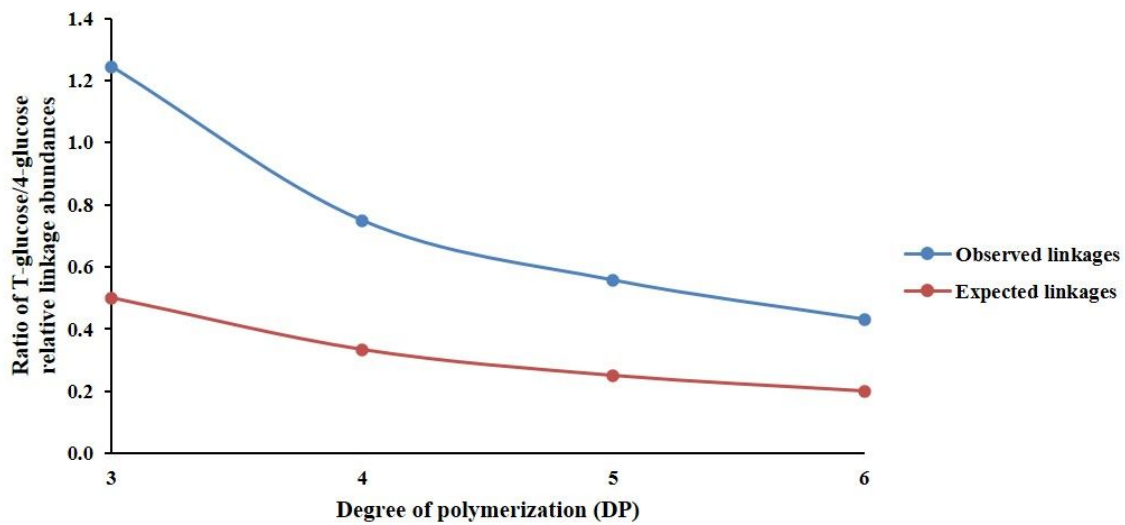

29

30 **Figure S-1.** Plot of the ratios of T-glucose/4-glucose relative linkage abundances versus DP of  
31 observed and expected maltooligosaccharide linkages.

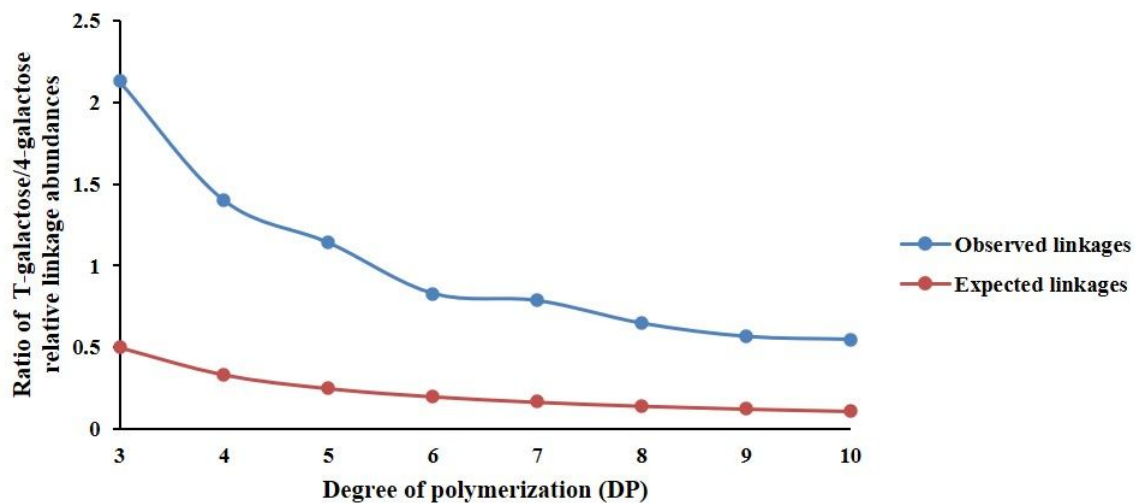

32

33 **Figure S-2.** Plot of the ratios of T-galactose/4-galactose relative linkage abundances versus DP  
 34 of observed and expected linkages from galactan oligosaccharides.
